# Supplementary material for: Dye-enhanced visualization of rat whiskers for behavioral studies
Source: eLife journal article supplement (doi:10.7554/elife.25290), 2017-06-14

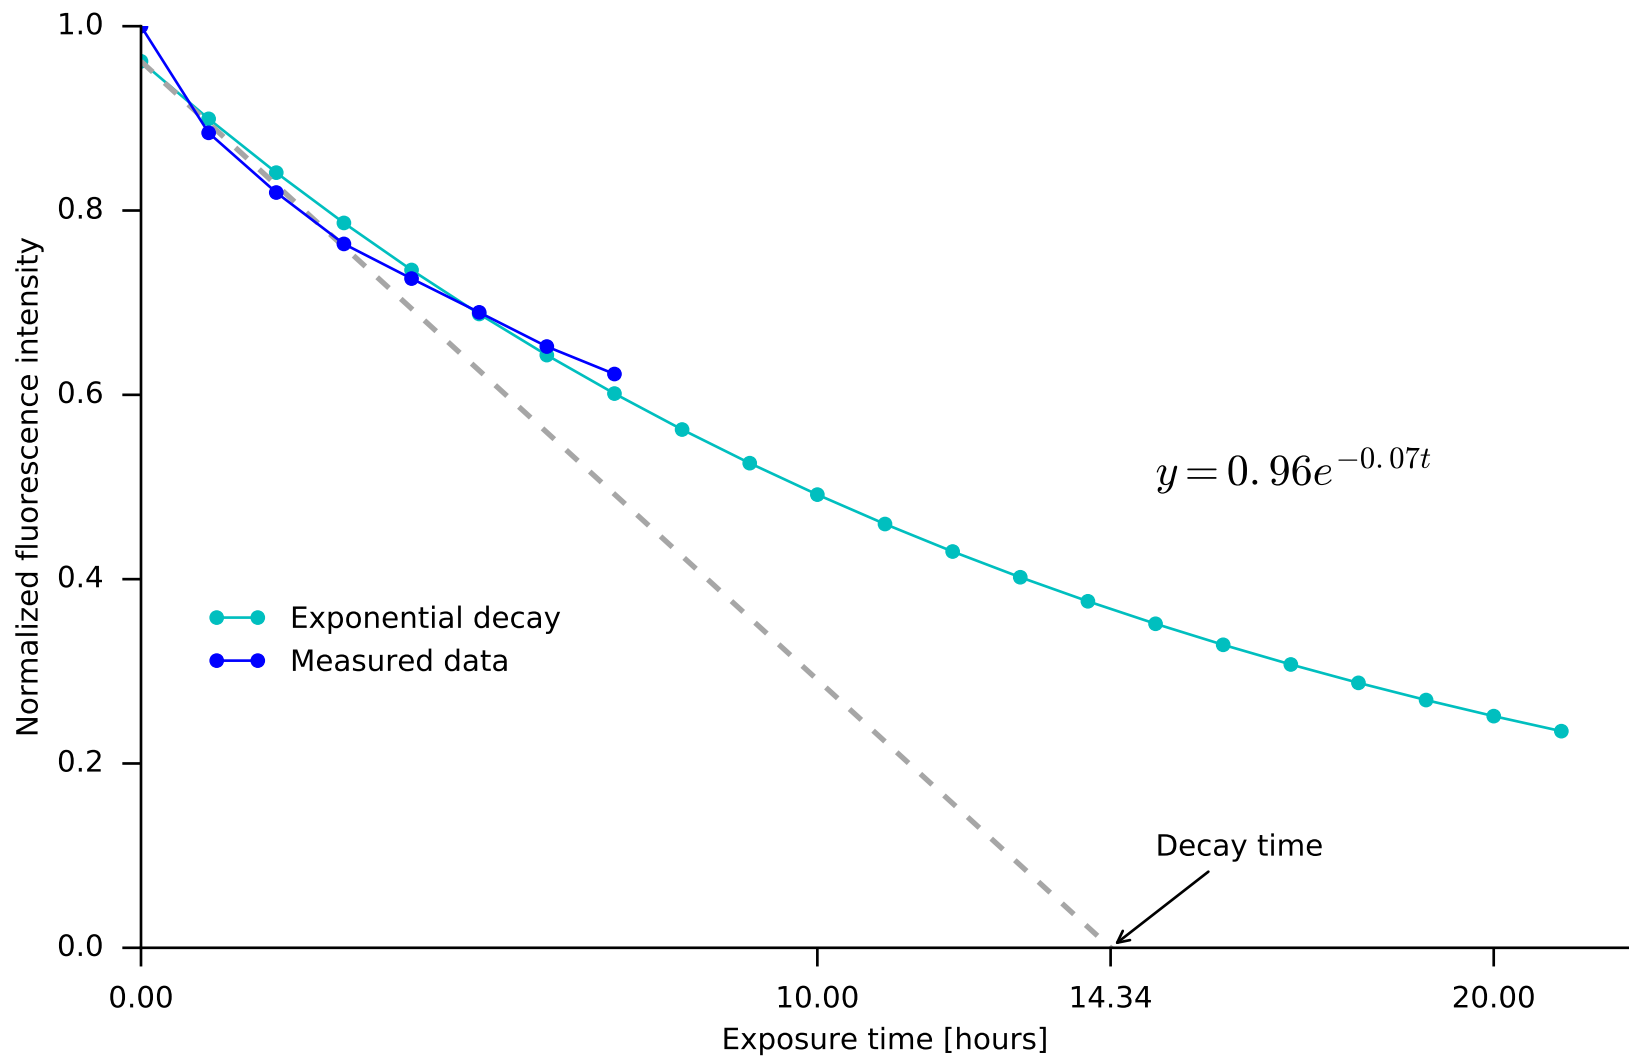

Supplement: supp [file elife_poa_e25290_Figure_Supplement_2.pdf › elife_poa_e25290_Figure_Supplement_2.pdf]
