# Supplementary material for: Dye-enhanced visualization of rat whiskers for behavioral studies
Source: eLife journal article supplement (doi:10.7554/elife.25290), 2017-06-14
Supplement: supp [file elife_poa_e25290_supplementary_materials:_table_1.docx]

**SUPPLEMENTARY MATERIALS**

|  |  |  |  |  |  |
| --- | --- | --- | --- | --- | --- |
| 56 | 94 | 7 | 3.77x103 | 50 | 1.5x10-4 |
| 53 | 95 | 6 | 2.89x103 | 70 | 1.5x10-4 |
| 45 | 81 | 4 | 3.7x103 | 120 | 1.0x10-4 |
| 41 | 83 | 7 | 4.39x103 | 30 | 2.0x10-4 |
| 38 | 89 | 7 | 2.89x103 | 80 | 1.3x10-4 |
| 37 | 67 | 9 | 3.95x103 | 60 | 1.3x10-4 |
| 33 | 82 | 6 | 1.58x103 | 80 | 1.2x10-4 |
| 26 | 48 | 3 | 4.39x103 | 80 | 4.0x10-4 |
| 23 | 49 | 4 | 3.25x103 | 20 | 0.8x10-4 |
| 18 | 40 | 3 | 2.63x103 | 50 | 1.0x10-4 |

**Supplementary Table 1**
